# Supplementary material for: APUM23, a PUF family protein, functions in leaf development and organ polarity in Arabidopsis
Source: PubMed Central journal article supplement (PMC3935572; doi:10.1093/jxb/ert478), 2014-01-21
Supplement: supp_ert478_jexbot114728_file001.pdf [file supp_ert478_jexbot114728_file001.pdf]

**Supplementary Figure 1. Phenotype of the confirmed T-DNA insertion line of *APUM23*, SAIL\_757\_B08 (*apum23-1*).** Note that SAIL\_757\_B08 (right) has pale green and pointed leaves as compared to Col (left), which resembles *apum23-3*.

**Supplementary Figure 2. Spatial expression patterns of *KAN1* and *AS2* in Col and *apum23-3*.** Promoter:GUS reporters show the spatial expression of *KAN1* in Col (A) and *apum23-3* (B), and that of *AS2* in Col (C) and *apum23-3*(D). Bar=50µm

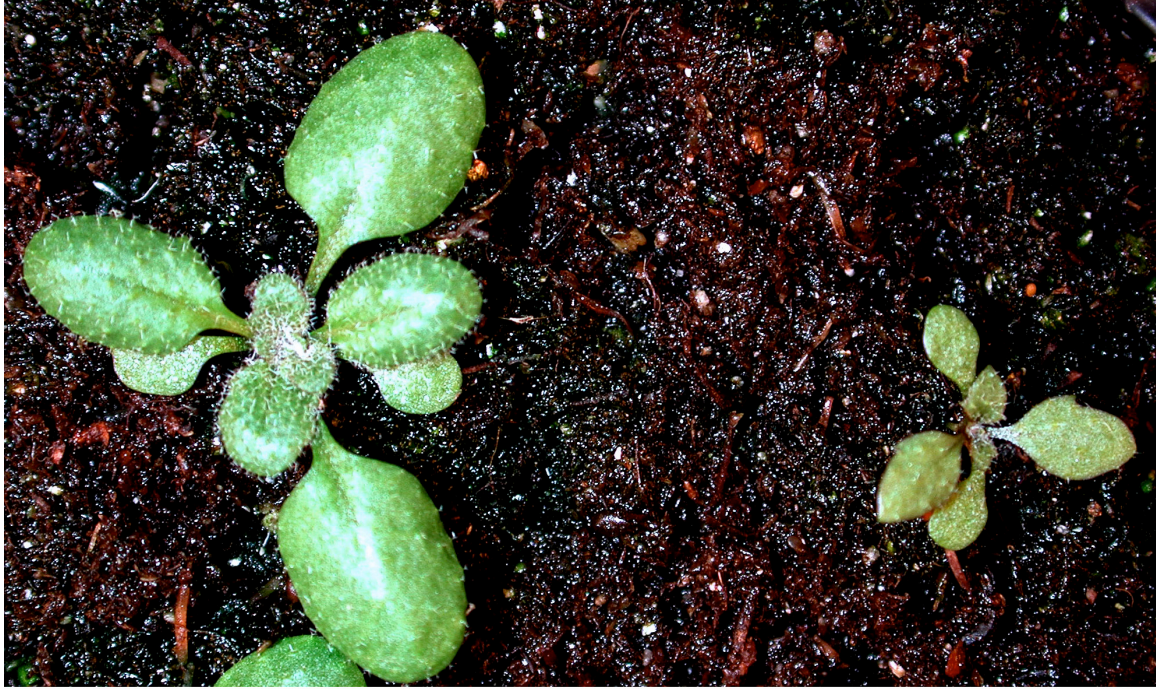

Col

SAIL\_757\_B08

Suppl. Figure 1

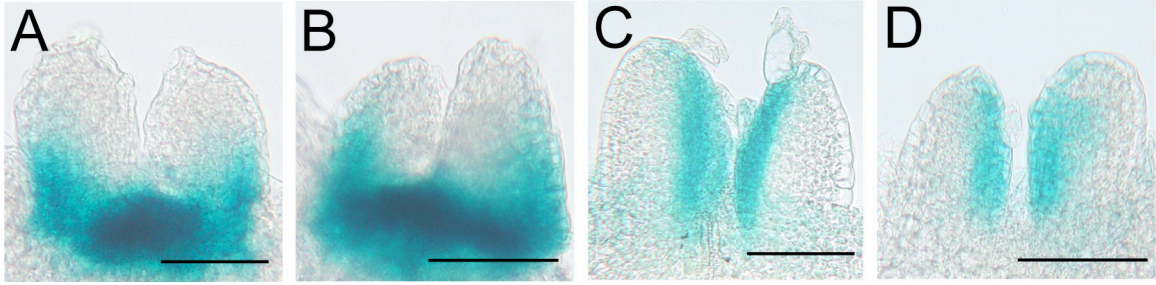

Suppl. Figure 2

Supplementary Table

| Gene  | Forward primer               | Reverse primer               |
|-------|------------------------------|------------------------------|
| GAPC2 | ctgttgggaaagtgtgccatccctcaat | catgtgaacgataaggtaacgacacga  |
| PHB   | ctggtgaagccgacccaaatggctgt   | tggagccaggacgaggagcaatgg     |
| REV   | tgcaatggcgatctcaccgtctgg     | accgagtcgtcgtccaagtgaat      |
| AS1   | gctgcgctcaaccgccaatcc        | tgccaagctcggcgccctcc         |
| AS2   | gccgacatgcgcctccgtga         | tgatgagtggcggcgaggataccg     |
| TAS3  | gaaagagagagaagagctccatgg     | ccgactaaaagctcagataggataacac |
| KAN1  | agcacatgtgaagagccatttgag     | tgtgcccttgatccgctgatgattg    |
| KAN2  | gtggccatgaaagagcaacacc       | ctgcttgtcggttgtcttcac        |
| ARF3  | ggtggagccggtgccaggaga        | accctgctgctgccgatga          |
| ARF4  | ggcatgattctgcaatgtggtgtgg    | ggagaagaatcaggctggctcacagaa  |
| FIL   | gcaccaccgtaaccgcctcca        | ttgtctggcacgagcccgaagtg      |
